# Supplementary material
Source: PubMed Central journal article supplement (PMC7368493)

Supplemental Figure 1. Mice were immunized with 100 µg of mouse MOG<sub>35-55</sub> peptide emulsified in CFA supplemented with 4 mg/ml heat-killed *Mycobacterium tuberculosis* (HKMT). Control mice received nothing or CFA supplemented with HKMT. A., From 1 day post-infection, clinical signs of mice were recorded every 2 days. B., Upon necropsy, splenocytes were incubated overnight with MOG<sub>35-55</sub> peptide after which supernatants were analyzed by ELISA for IL-2, IL-6, IL-17A or IFN-γ. C., IL-17A was also analyzed in the serum.

Suppl Fig 1A.

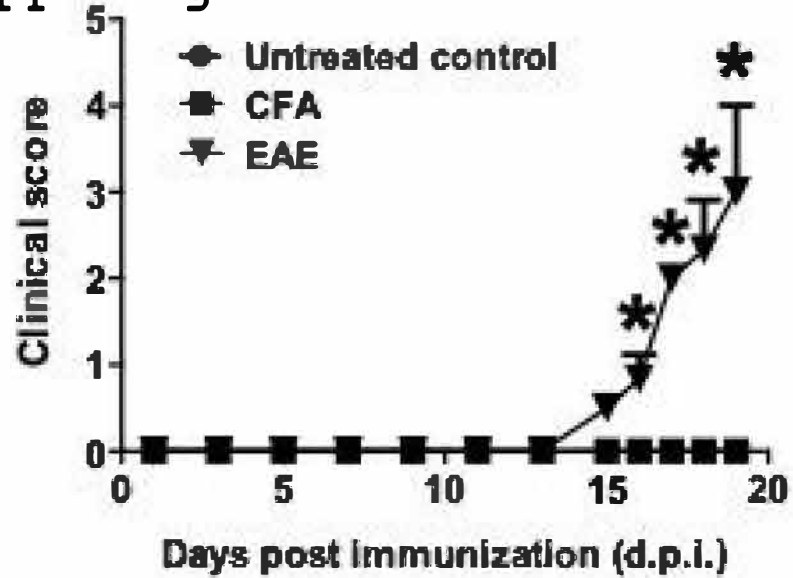

B.

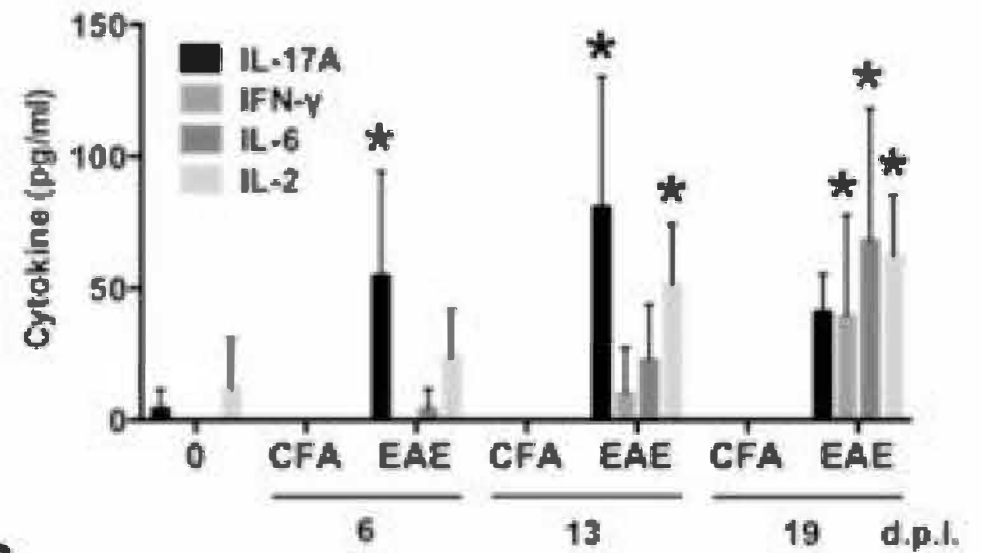

C.

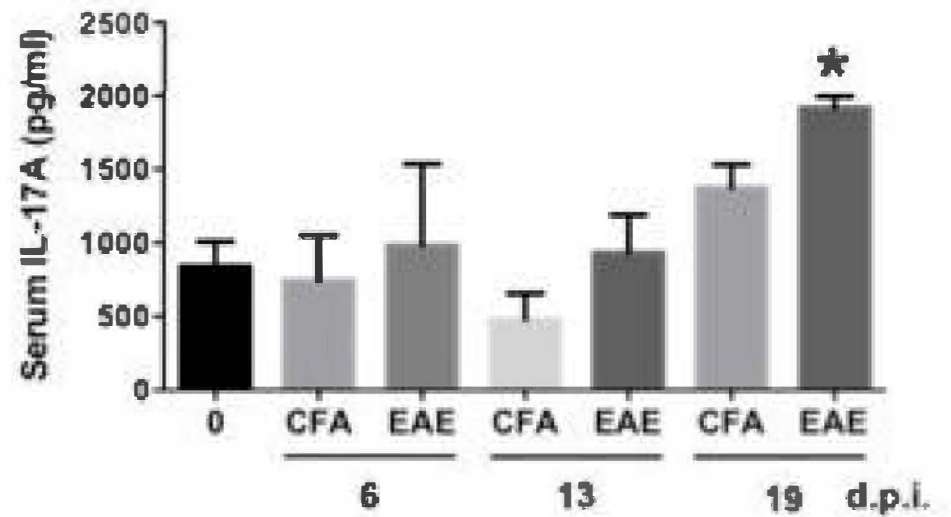

Supplement: NIHMS1601269-supplement-1.pdf [file NIHMS1601269-supplement-1.pdf]
